# Supplementary material
Source: PubMed Central journal article supplement (PMC5510721)

### Supplementary Figures Information

**S1.** (a) Representative TEM sections of liver, ileum and lung from *mdr1a*<sup>-/-</sup> and WT mice (n=6) Scale bar 2µm. (b) TEM sections of colons from *il10*<sup>-/-</sup> and WT following 3 days of 3% DSS colitis. Orange scale bar is 2µm and white scale bar is 0.5µm. Yellow asterisks – denoting abnormal mitochondria.

**S2.** (a) Western blot analyses of p62, Parkin, PINK, LC3I-II in isolated mouse CECs (n=3/group). (b) Quantitative PCR of mitochondria DNA normalised to nuclear *18S* in CECs (n=6/group). (c) Immunohistochemistry of Ki67 in colon sections (n=6/group). Quantification in right panel, black scale bar 100µm (d) TUNEL assay (green: quantification in right panel), white scale bar 100µm (n=6/group). WT – wild-type. All data represent mean± SEM.

**S3.** (a) (b) Quantitative PCR of *MDR1* gene (triplicate) and representative Western blotting of MDR1 (C219) in T84 *shMDR1* and *shCtrl*. (c) Basal OCR of T84 *shMDR1* and *shCtrl* (5 replicates). (d) Western blotting of p62 and SOD2 and, (e) LC3I/II in untreated or bafilomycin (100nM for 2 hours) treated *shMDR1* vs. *shCtrl* CECs (representative of 2 independent experiments). All data represent mean± SEM.

**S4.** (a) Representative H&E colon sections following colonic treatment with rotenone at 1, 10 and 100µM (3x/week and harvested at Day 7; n=4/group) in WT mice. (b) Representative H&E colon sections and (c) histology colitis scores of *mdr1a*<sup>-/-</sup> and WT mice (n=5 in 0.25% DSS groups and n=6 in rotenone groups), black scale bar 100µm, yellow arrows indicating leukocyte infiltration. (d) Representative TUNEL staining in *mdr1a*<sup>-/-</sup> and WT mice (n=3/group) and (e) quantification of TUNEL+ve CECs (green: quantification in right panel), white scale bar 100µm. (e) qPCR analyses of isolated CECs in rotenone vs. vehicle treated *mdr1a*<sup>-/-</sup> and untreated WT mice (n=6/group). \*p<0.05 comparing vehicle vs. rotenone treatment in *mdr1a*<sup>-/-</sup> mice. All data represent mean± SEM.

**S5.** (a) Western blotting of PARP and cleaved PARP products in T84 *shMDR1* vs. *shCtrl* treated with rotenone (10 $\mu$ M), CCCP (10 $\mu$ M), Cisplatin 10ng/ml for 12 hours in T84 *shMDR1* vs. *shCtrl*. (b) Live cell imaging of T84 *shMDR1* vs. *shCtrl* treated with rotenone (5 $\mu$ M) at 0 and 24 hours. Loss of viability – rounded appearance, increased lucency and decreased adherence. (c) Rate of transepithelial electrical resistance (TEER) loss in T84 *shMDR1* vs. *shCtrl* grown on 12-well transwell plates following culture with rotenone 5 $\mu$ M, (n=3). (d) IL-8 ELISA of T84 *shMDR1* vs. *shCtrl* 12 hours following co-culture with rotenone (10 $\mu$ M), flagellin (10ng/ml) and bacterial CpG (2 $\mu$ M) (n=2/treatment group, representative of 2 independent experiments), R=rotenone, F=flagellin. All data represent mean $\pm$  SEM.

**S6.** (a) Representative H&E staining of rotenone vs. vehicle vs. MQ vs. non-colitic *mdr1a*<sup>-/-</sup> colons. (b) Representative H&E staining of MQ vs. vehicle following 7-day 2% DSS colitis protocol in WT and *mdr1a*<sup>-/-</sup> colons, (c) Representative H&E staining of MQ vs. vehicle treated WT colons following 5-day 2% DSS and 5-days recovery, scale bar 50 $\mu$ m.

## Supplementary Material and Methods

### Immunohistochemistry, Western blotting and qPCR

Formalin-fixed paraffin-embedded sections were stained according to standard immunohistochemistry protocols and Ab dilutions are available on request. Cell death was assessed by TdT-mediated dUTP nick end labelling (TUNEL) of formalin-fixed paraffin-embedded slides using *in situ* TUNEL cell death detection kit (Roche). We enumerated total TUNEL<sup>+</sup> and Ki67<sup>+</sup> IECs in entire colonic slide sections and data

expressed as percentage of total IECs (>3 slides per subject). For Western blotting, cells were lysed with RIPA buffer, protein quantification by Bradford protocol, 20-40 µg of total protein was applied to each lane and subjected to SDS-PAGE and Western blotting via enhanced chemiluminescence (Luminata Classico, Millipore). Total RNA was isolated from cells using RNeasy Mini kit (QIAGEN) and qPCR performed with SYBR Green RT-PCR Kit (Qiagen Cat # 204243) on ABI 7900 system. Experimental groups were compared using  $\Delta\Delta C_t$  values. Mouse *KC* 5-GGCTGGGATTACCTCAAGAA-3, 5-CTTGGGGACACCTTTTAGCATC-3; *il-6* 5-GATGGATGCTACCAAAGTGA-3, 5-GGAAATTGGGGTAGGAAGGA-3; *tnf- $\alpha$*  5-CTGGGACAGTGACCTGGACT-3, 5-GCACCTCAGGGAAGAGTCTG-3; mouse *18S* Housekeeping FORWARD, 5-TAGAGGGACAAGTGGCGTTC-3; REVERSE 5-CGCTGAGCCAGTCAGTGT-3.

### Chemicals

Anti-p62/SQSTM1 (1:1000 IHC, MBL), monoclonal anti-SOD2 (ab68155), polyclonal anti-SOD2 (1:50, PA5-30604 ThermoScientific), anti-VDAC (Abcam ab18988), PARP (Cell signalling), anti-PINK-1 (1:100 IHC, Abcam ab23707), anti-Parkin (Abcam ab81153), anti-Ki67 (Novo castra NCL-Ki67p), anti-TLR9 (abcam ab52967). Antimycin A (A8674-Sigma), Rotenone (R8875-Sigma), Carbonyl-cyanide 4-(trifluoromethoxy) phenylhydrazone, CCCP (C2920 – Sigma), Bafilomycin (B1793-Sigma) TLR9 antagonist ODN TTAGGG (Invivogen), Lipofectamine (ThermoFisher). MitoQ<sub>10</sub> was a kind gift from Dr Mike Murphy, University of Cambridge. Mitotracker Green and MitoSOX (Molecular Probes). GFP-LC3 plasmid was kindly provided by Dr C Stevens, University of Edinburgh. IL-8 and IL-6 ELISA (Cambridge Bioscience).

### Mouse genotyping primers

*SOD2*: LoxNeo 5-AGCTTGGCTGGACGTAA-3, *MnSOD#42* 5-CGAGGGGCATCTAGTGGAGAA-3; *P2* 5-TTAGGGCTCAGGTTTGTCCAGAA-3; Flox-allele 358 bp, wild-type 500 bp; 95C for 5 mins, 32 cycles of 94C for 1 min, 58C for 1 min, 72C for 2 mins and finally 72C for 10 mins. IMR 1878 5-GTGTGGGACAGAGAACAACC-3, IMR 1879 5-ACATCTTCAGGTTCTGCGGG-3; 94C for 3 mins, 35 cycles of 94C for 30 seconds, 64C for 1 min, 72C for 1.5 min and finally 72C for 2 mins; villin-Cre transgene 1100 bp.

**Table S6:** Genes involved in mitochondria function (using gene-set defined by term GO:0005739) within subset of 574 genes within 100 kb of loci with genome wide statistical significant association with inflammatory bowel disease ( $p < 5 \times 10^{-8}$ ).

| Gene            | Gene ID | P-value                | Protein Name                                                        |
|-----------------|---------|------------------------|---------------------------------------------------------------------|
| <i>SLC25A28</i> | 81894   | $1.70 \times 10^{-26}$ | Mitoferrin-2                                                        |
| <i>VAR5</i>     | 7407    | $4.83 \times 10^{-26}$ | Valine--tRNA ligase                                                 |
| <i>RNF5</i>     | 6048    | $9.47 \times 10^{-24}$ | E3 ubiquitin-protein ligase RNF5                                    |
| <i>HSPA1A</i>   | 3303    | $1.88 \times 10^{-23}$ | Heat shock 70 kDa protein 1A/1B                                     |
| <i>HSPA1B</i>   | 3304    | $1.88 \times 10^{-23}$ | Heat shock 70 kDa protein 1A/1B                                     |
| <i>HSPA1L</i>   | 3305    | $1.88 \times 10^{-23}$ | Heat shock 70 kDa protein 1-like                                    |
| <i>TAP1</i>     | 6890    | $2.78 \times 10^{-21}$ | Antigen peptide transporter 1                                       |
| <i>GPX1</i>     | 2876    | $2.40 \times 10^{-20}$ | Glutathione peroxidase 1                                            |
| <i>SLC22A4</i>  | 6583    | $7.07 \times 10^{-17}$ | Solute carrier family 22 member 4                                   |
| <i>PLA2G2A</i>  | 5320    | $2.31 \times 10^{-16}$ | Phospholipase A2, membrane associated                               |
| <i>MCCD1</i>    | 401250  | $4.56 \times 10^{-16}$ | Mitochondrial coiled-coil domain protein 1                          |
| <i>STARD3</i>   | 10948   | $1.35 \times 10^{-15}$ | StAR-related lipid transfer protein 3                               |
| <i>LRRK2</i>    | 120892  | $3.18 \times 10^{-15}$ | Leucine-rich repeat serine/threonine-protein kinase 2               |
| <i>DLD</i>      | 1738    | $4.50 \times 10^{-14}$ | Dihydrolipoyl dehydrogenase, mitochondrial                          |
| <i>STAT3</i>    | 6774    | $2.16 \times 10^{-12}$ | Signal transducer and activator of transcription                    |
| <i>PTRF</i>     | 284119  | $2.16 \times 10^{-12}$ | Polymerase I and transcript release factor                          |
| <i>GPX4</i>     | 2879    | $2.37 \times 10^{-11}$ | Phospholipid hydroperoxide glutathione peroxidase, mitochondrial    |
| <i>TUFM</i>     | 7284    | $3.86 \times 10^{-10}$ | Elongation factor Tu, mitochondrial                                 |
| <i>PARK7</i>    | 11315   | $7.36 \times 10^{-10}$ | Protein DJ-1                                                        |
| <i>NDUFAF3</i>  | 25915   | $7.92 \times 10^{-10}$ | NADH dehydrogenase [ubiquinone]1 alpha subcomplex assembly factor 3 |
| <i>SLC25A20</i> | 788     | $1.06 \times 10^{-9}$  | Mitochondrial carnitine/acylcarnitine carrier protein               |
| <i>ATG5</i>     | 9474    | $1.26 \times 10^{-9}$  | Autophagy protein 5                                                 |
| <i>TRIM39</i>   | 56658   | $1.46 \times 10^{-9}$  | E3 ubiquitin-protein ligase TRIM39                                  |
| <i>C6orf136</i> | 221545  | $2.77 \times 10^{-9}$  | Uncharacterized protein C6orf136                                    |
| <i>TRIM31</i>   | 11074   | $1.02 \times 10^{-8}$  | E3 ubiquitin-protein ligase TRIM31                                  |
| <i>SDHC</i>     | 6391    | $1.08 \times 10^{-8}$  | Succinate dehydrogenase cytochrome b560 subunit, mitochondrial      |
| <i>UQCRC1</i>   | 29796   | $4.54 \times 10^{-8}$  | Cytochrome b-c1 complex subunit 9                                   |
| <i>VAR5</i>     | 57176   | $1.21 \times 10^{-9}$  | Valine--tRNA ligase, mitochondrial                                  |

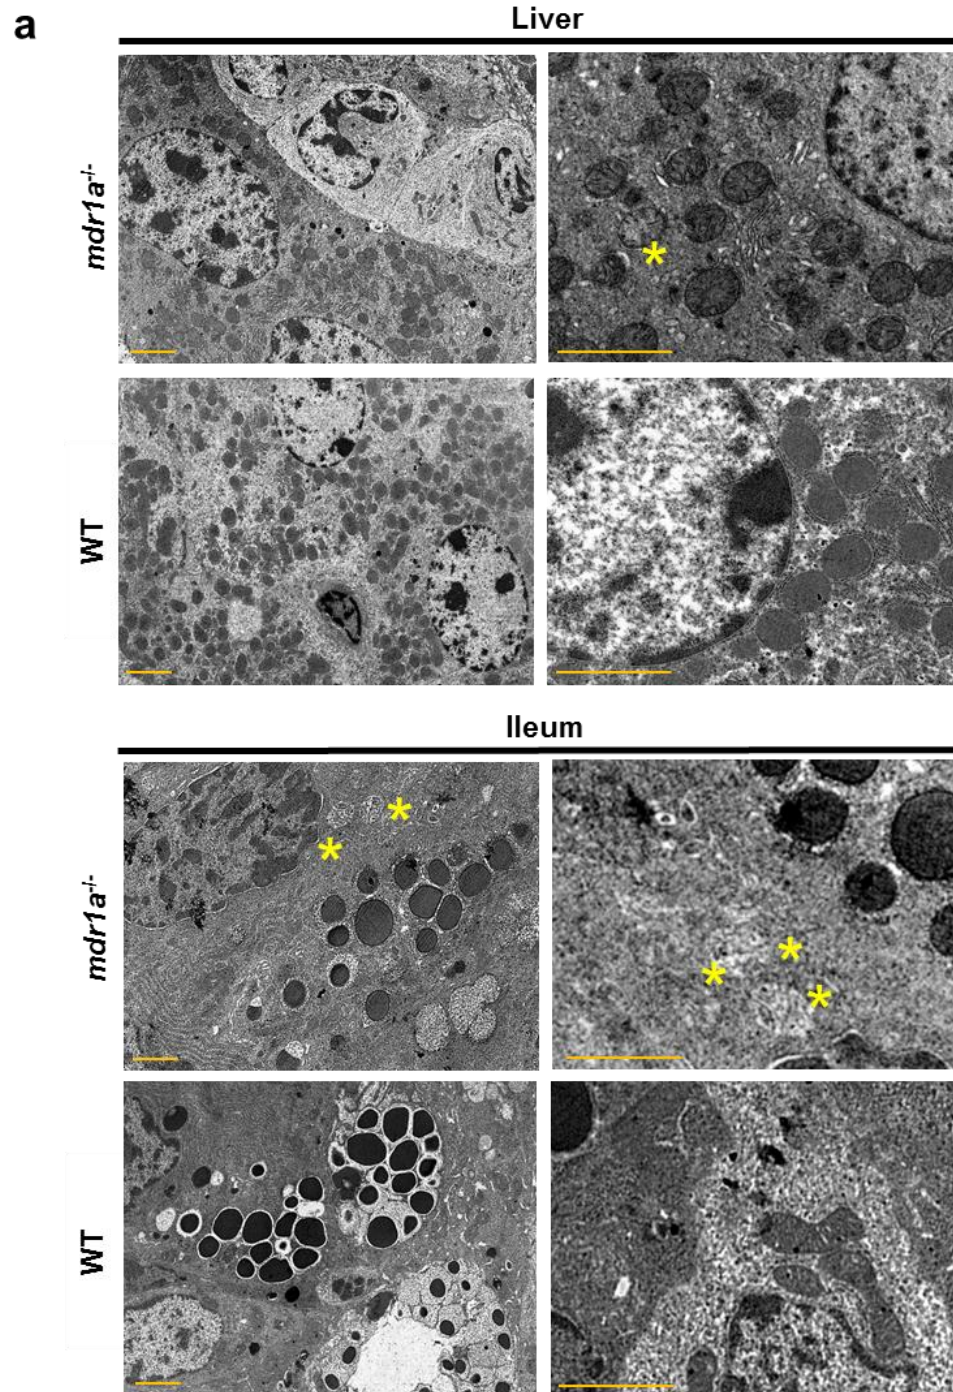**b**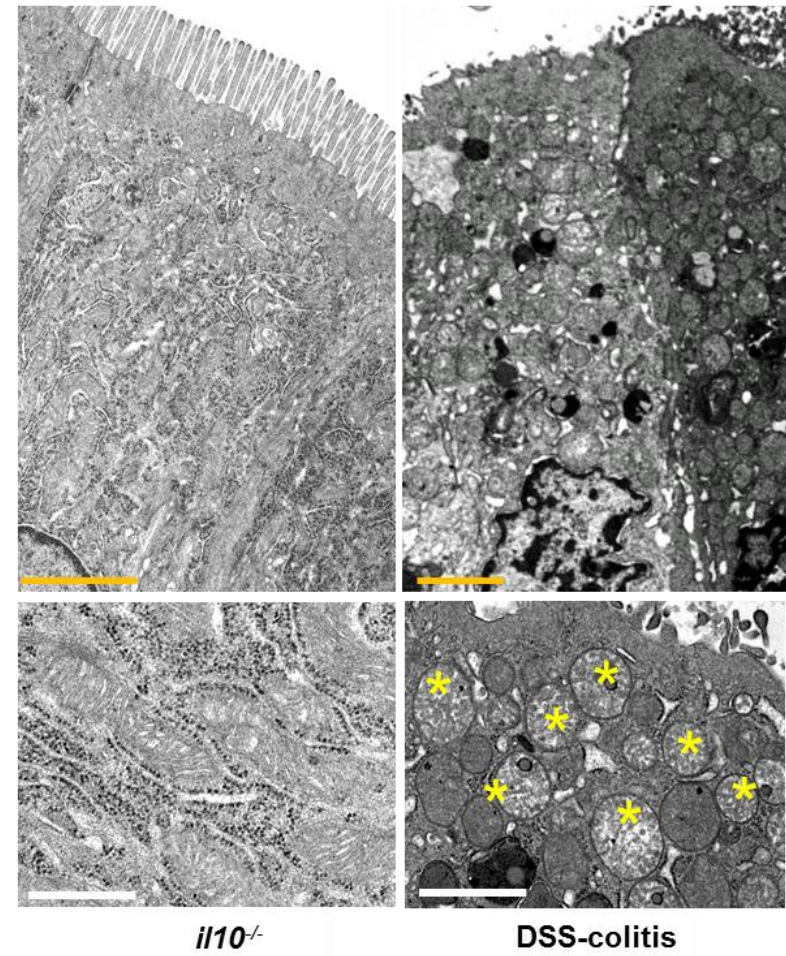



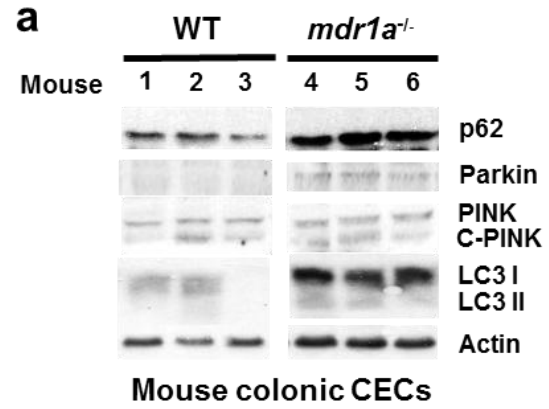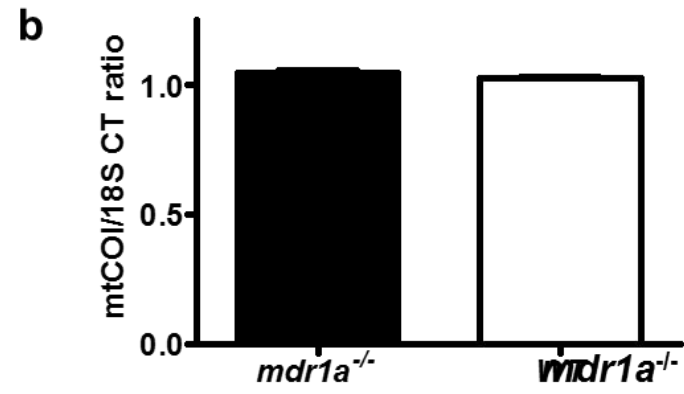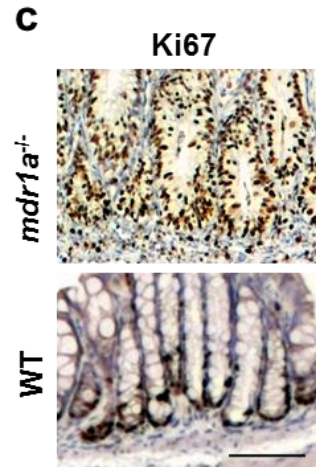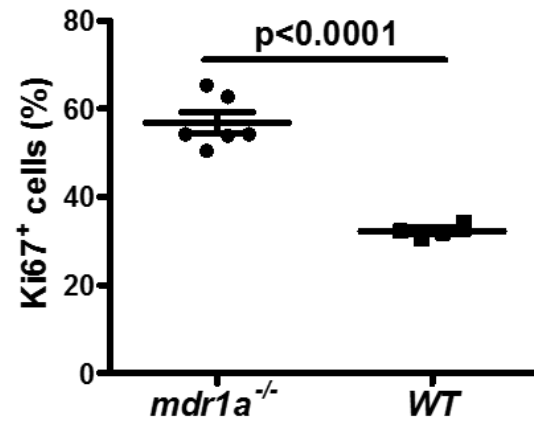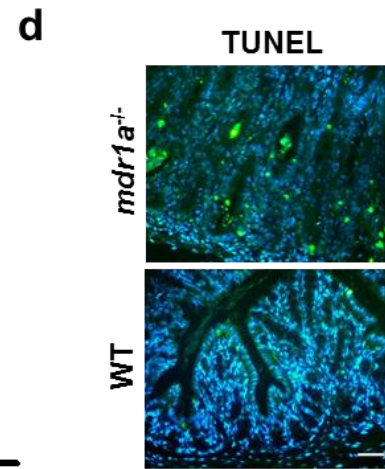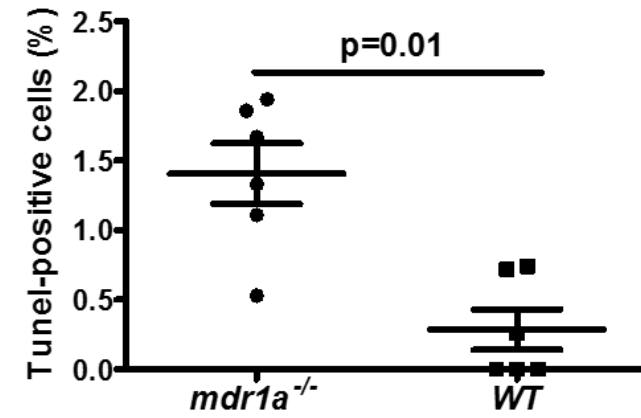

SI 3

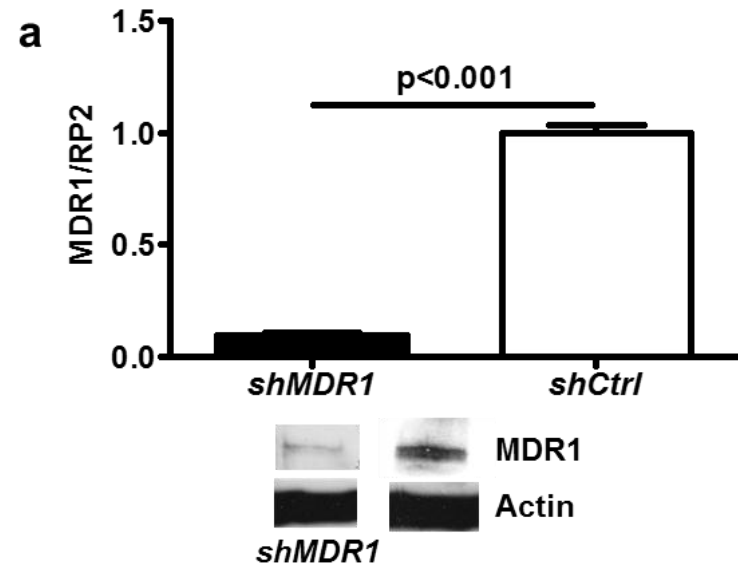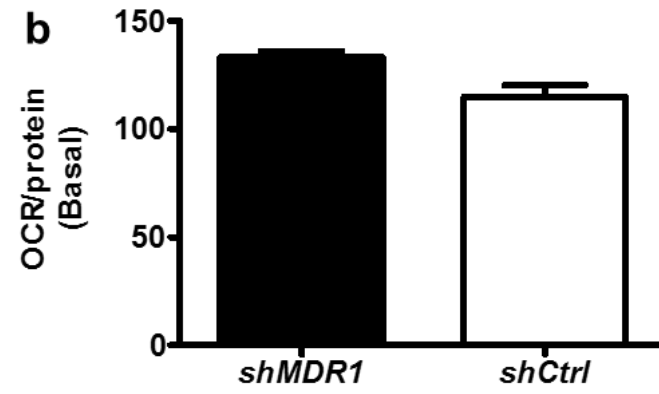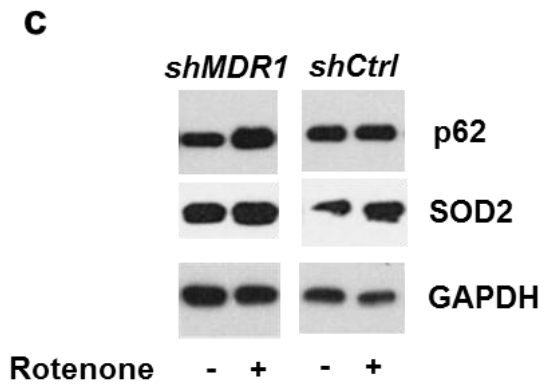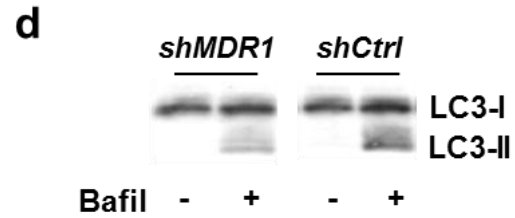



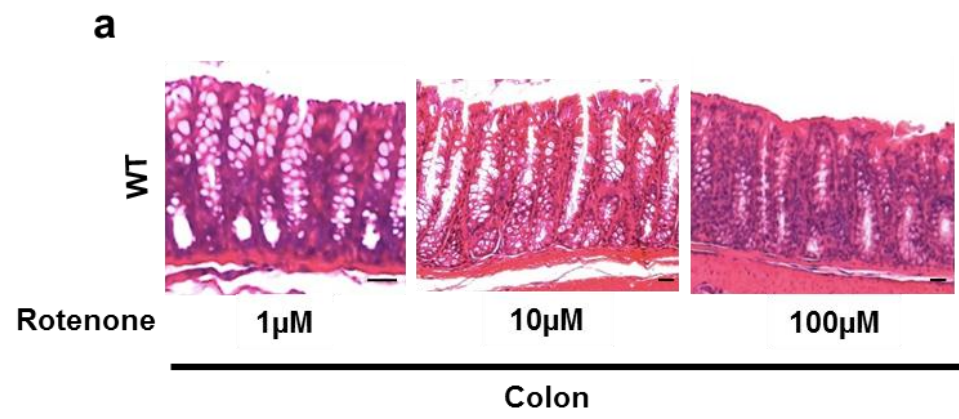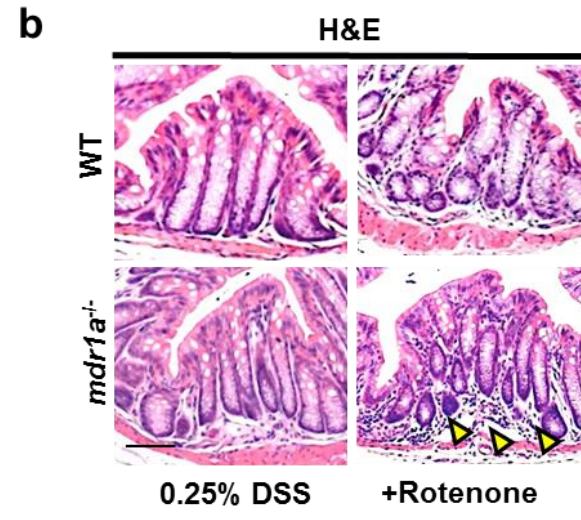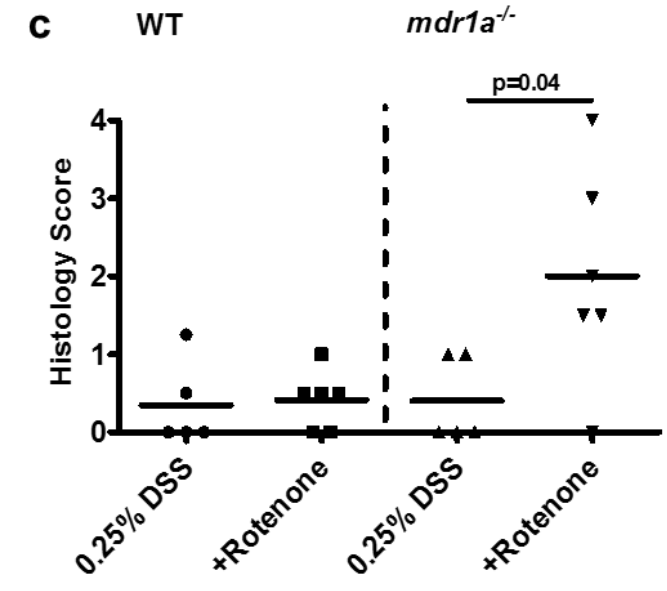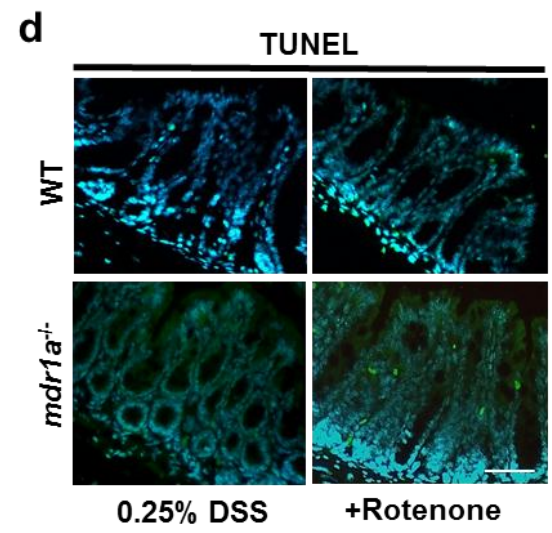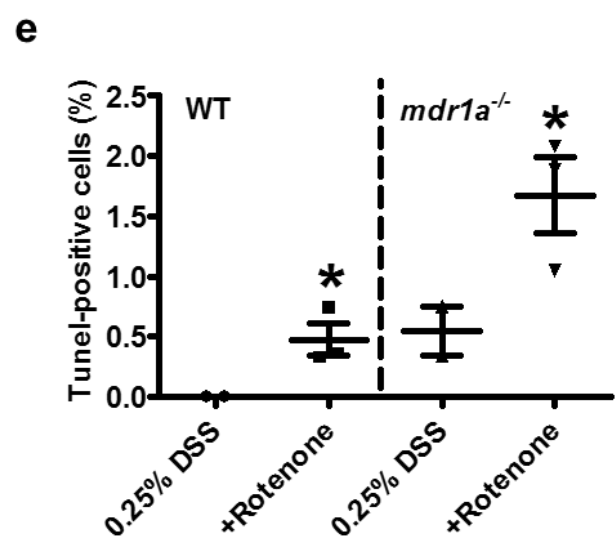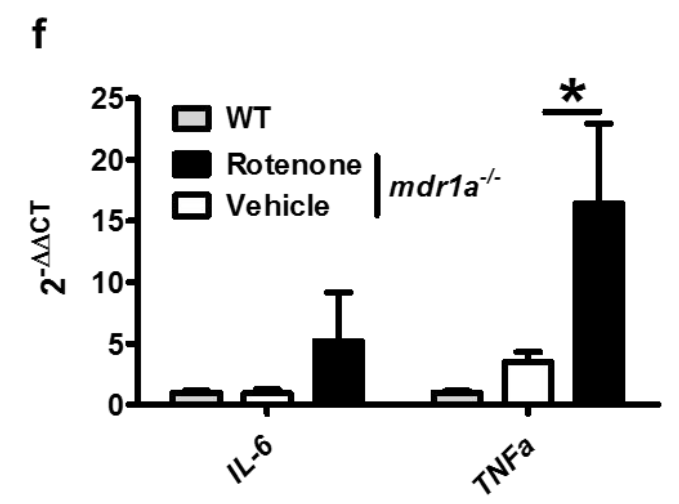

SI 5

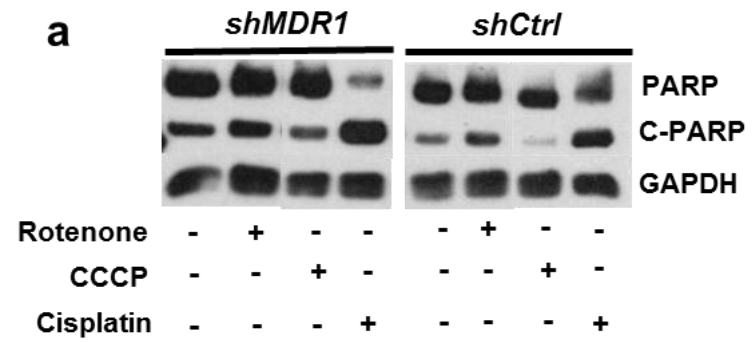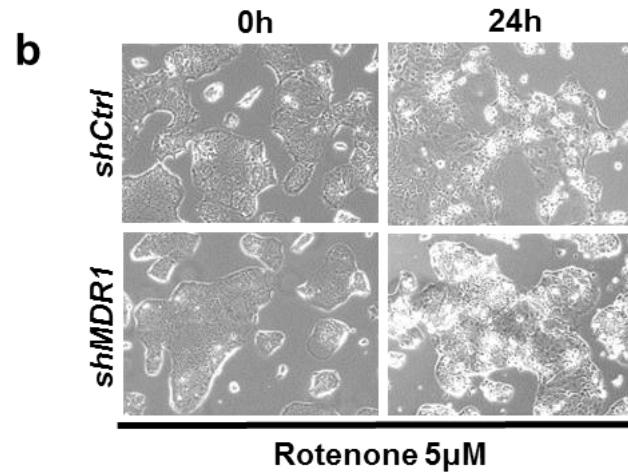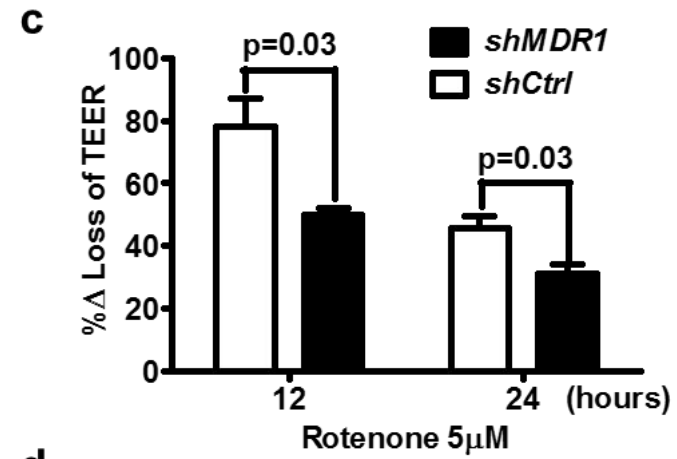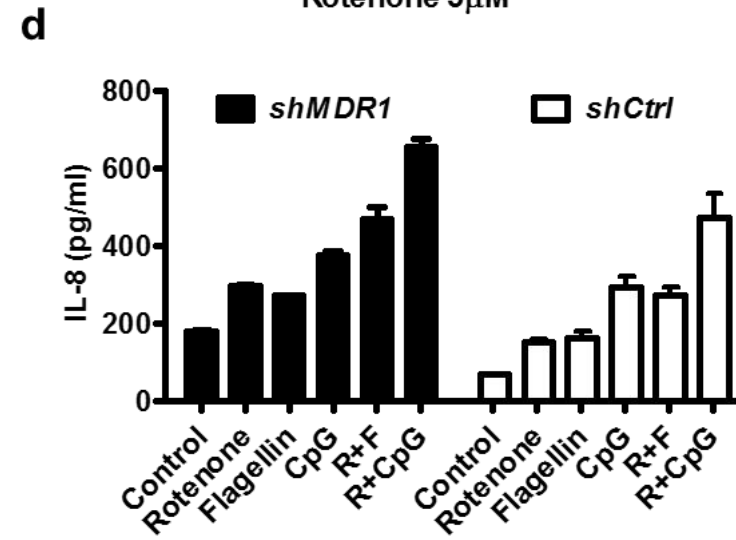

SI 6

**a**

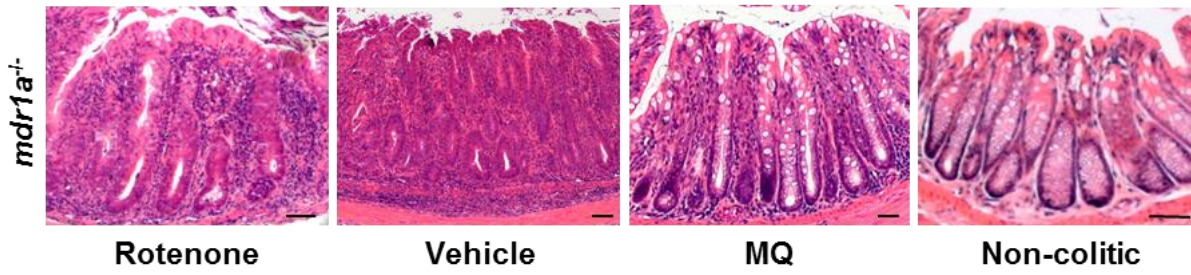

**b**

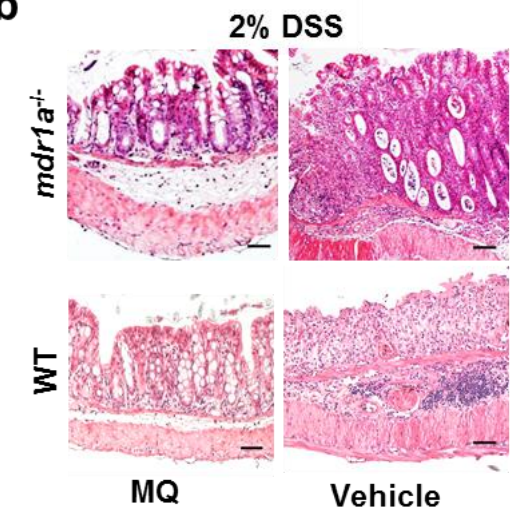

**c**

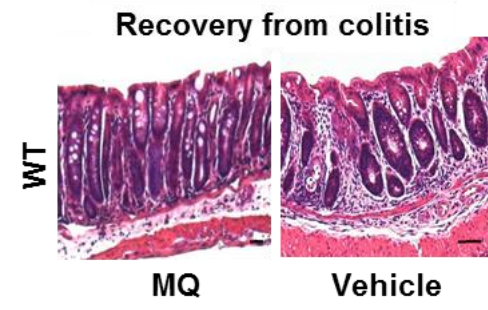

Supplement: NIHMS71809-supplement-Supplementary_Material.pdf [file NIHMS71809-supplement-Supplementary_Material.pdf]
